# Supplementary material for: CDCP1 Deletion Protects Against Pressure Overload-Induced Cardiac Dysfunction and Fibrosis in Mice
Source: Research Square preprint supplement (doi:10.21203/rs.3.rs-9236741/v1), 2026-05-08
Supplement: Supplementary file 2 [file 4debc816bdfa66d107039b7a.docx]

**SUPPLEMENTARY FIGURES**

**Supplementary Figure 1**. **Baseline characterization and echocardiographic measurements of the pressure overload mouse model**. A, Body weights of wild-type (WT, red; n=14, 9 males, 5 females) and Cdcp1 knockout (KO, blue; n=10, 7 males, 3 females) mice measured weekly from age 3 to 11 weeks. Data are shown as mean (solid lines) ± SD (dashed lines). No statistically significant differences were observed between genotypes at any measured time point (P=0.478, two-way ANOVA). B, Survival curves of WT and Cdcp1 KO mice treated with saline (control) or angiotensin II/phenylephrine (AngII/PE) via osmotic minipump over 14 weeks. Three deaths occurred in AngII/PE WT (n=12), one at 13 weeks, two at 14 weeks post-implantation. All other groups (Saline WT, n=9; Saline KO, n=10; AngII/PE KO, n=9) demonstrated 100% survival. Log-rank (Mantel-Cox) test, P=0.056. C, Left ventricular (LV) ejection fraction (LVEF, %) at baseline, 4 weeks post AngII/PE infusion, and change in LVEF (% from baseline to 4 weeks). D, LV fractional shortening (LVFS, %) at baseline, 4 weeks post AngII/PE infusion, and change in LVFS (% from baseline to 4 weeks). For C-D: Saline WT, n=9; Saline KO, n=10; AngII/PE WT, n=9; AngII/PE KO, n=10. Data presented as mean±SD. Statistical analysis was performed using two-way ANOVA (genotype  treatment) followed by pre-specified pairwise comparisons using unpaired two-tailed Student’s t-tests.

**Supplementary Figure 2**. Volcano plots of i) Saline KO v/s Saline WT; ii) Ang/PE KO v/s Saline WT; iii) Ang/PE KO v/s Saline KO

**Supplementary Figure 3**. Experimental overview of spatial transcriptomics and deconvolution analysis of cardiac tissue from WT and Cdcp1 KO mice under saline or AngII/PE treatment.

**Supplementary Figure 4**. Characterization of cardiomyocytes using cell type deconvolution in spatial transcriptomics. A, Cardiomyocyte subtypes shown in rows for each experimental group. Color represents proportion of spot associated with subtype. B, Mean values of deconvoluted cardiomyocyte subtype proportions per experimental group.

**Supplementary Figure 5**. Characterization of fibroblasts (FB) and endothelial cells (EC) using cell type deconvolution in spatial transcriptomics. A, Fibroblasts and endothelial subtypes shown in rows for each experimental group. Color represents proportion of spot associated with subtype. B, Mean values of deconvoluted FB and EC subtype proportions per experimental group.

**Supplementary Figure 6**. Spatial distribution and GSEA GO-BP of A, CM4 cardiomyocyte subtype B, CM6 cardiomyocyte subtype.
