# Supplementary figures and images for: CDCP1 Deletion Protects Against Pressure Overload-Induced Cardiac Dysfunction and Fibrosis in Mice
Source: Research Square preprint supplement (doi:10.21203/rs.3.rs-9236741/v1), 2026-05-08

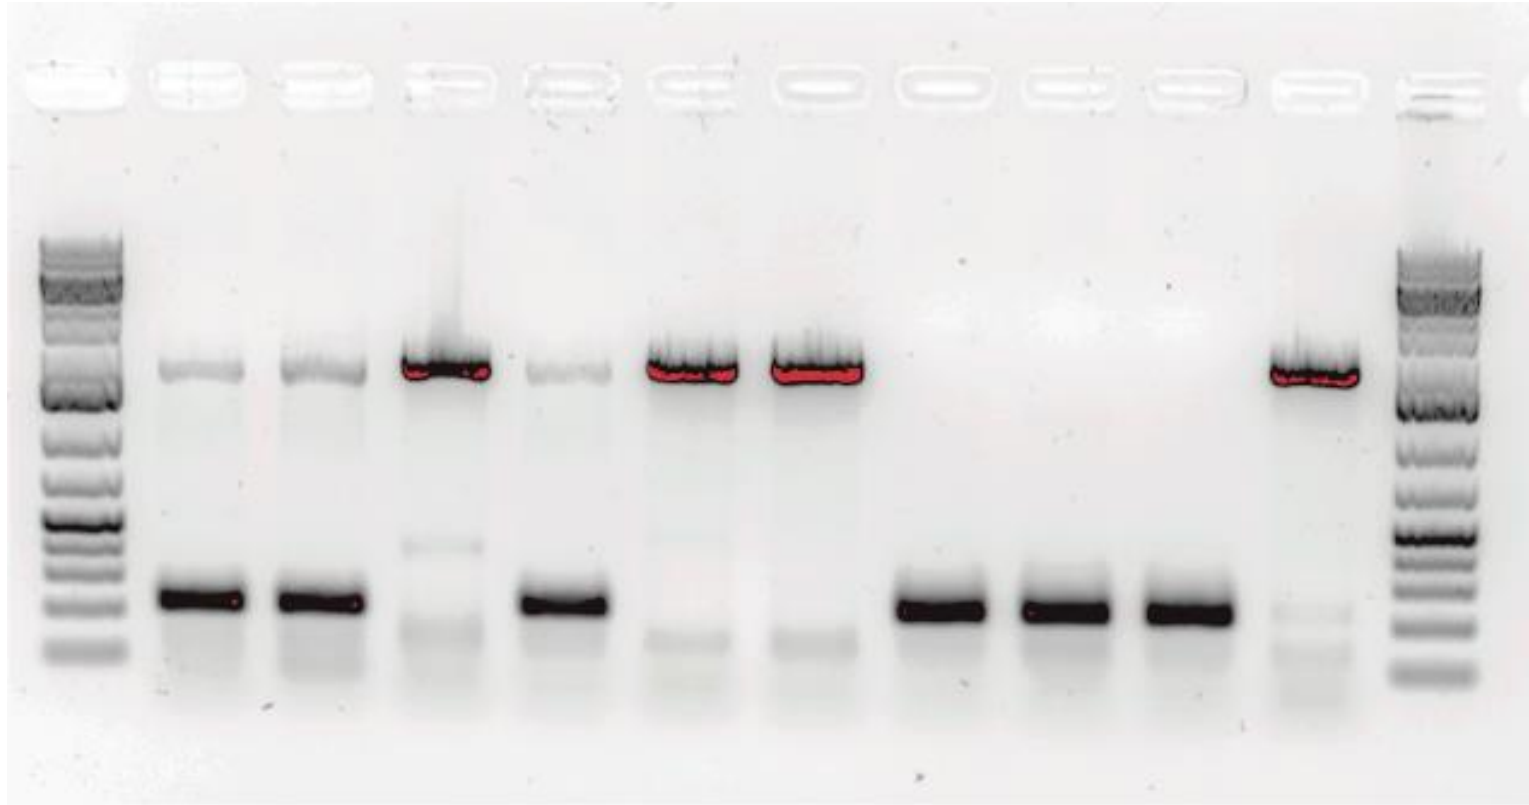

**Uncropped gel corresponding to Figure 1B**

Supplement: Supplementary file 1 [file 3819d4ad9db2b60d25b5f528.pdf]
